# Supplementary material for: Complete Chloroplast Genome Sequence and Phylogenetic Analysis of Paeonia ostii
Source: PubMed Central journal article supplement (PMC6017096; doi:10.3390/molecules23020246), 2018-01-26
Supplement: molecules-23-00246-s001.pdf [file molecules-23-00246-s001.pdf]

**Table S1.** Primers used for assembly validation.

| Primer  | Sequence (5'>3')                               | Amplicon Size (bp) |
|---------|------------------------------------------------|--------------------|
| LSC_IRa | TAGGAATCCAAATCTGCCGAA<br>ACCAATTAGGTTTACGACGAA | 475                |
| IRa_SSC | TTTAGGCAGAATACCGTCAC<br>AATAATTGATGGCATTACGAA  | 523                |
| SSC_IRb | AAATATTGTGACATTTTCGGTT<br>ATTTAGGCAGAATACCGTCA | 406                |
| IRb_LSC | CCAATTAGGTTTACGACGAA<br>TATGATGCCCTTCTTATTGGA  | 614                |
